# Supplementary material for: Inhibitory Monoclonal Antibodies and Their Recombinant Derivatives Targeting Surface-Exposed Carbonic Anhydrase XII on Cancer Cells
Source: PubMed Central journal article supplement (PMC7763246; doi:10.3390/ijms21249411), 2020-12-10
Supplement: ijms-21-09411-s001.pdf [file ijms-21-09411-s001.pdf]

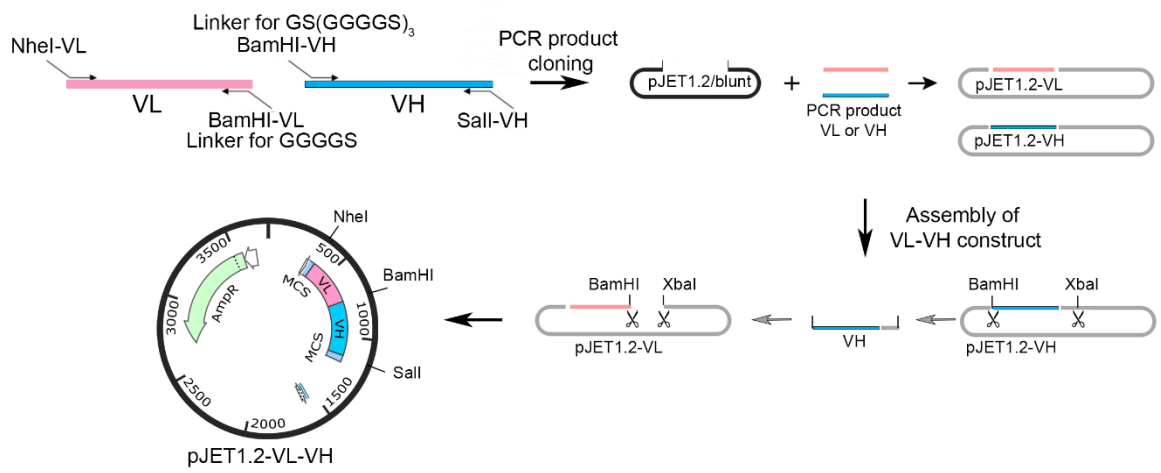

**Figure S1.** Schematic representation of the construction of expression vector for 14D6-derived scFv.
